# Supplementary material for: Genome-Wide Association Study Reveals the Genetic Basis of Total Flavonoid Content in Brown Rice
Source: MDPI journal article supplement (doi:10.3390/genes14091684), 2023-08-25
Supplement: s1 [file s1]

| LOC_Os09g24200                              |          |        |      |        |      |                     |
|---------------------------------------------|----------|--------|------|--------|------|---------------------|
| Hap.                                        | Promoter | Intron | Ind. |        | Jap. |                     |
|                                             | -617     | 1579   | Num. | GABA   | Num. | GABA                |
| Hap1                                        | G        | T      | 0    | —      | 46   | 158.80 <sup>a</sup> |
| Hap2                                        | A        | C      | 319  | 135.35 | 175  | 128.36 <sup>b</sup> |
| -log <sub>10</sub> ( <i>P</i> ) Full        | 4.3      | 4.1    |      |        |      |                     |
| -log <sub>10</sub> ( <i>P</i> ) <i>Jap.</i> | 4.1      | 3.9    |      |        |      |                     |

| LOC_Os09g24250                              |          |      |      |      |      |      |      |      |     |        |       |      |      |      |      |        |      |                     |
|---------------------------------------------|----------|------|------|------|------|------|------|------|-----|--------|-------|------|------|------|------|--------|------|---------------------|
|                                             | Promoter |      |      |      |      |      |      | Exon |     | Intron | 3'UTR |      |      |      | Ind. |        | Jap. |                     |
|                                             | -1527    | -588 | -570 | -569 | -190 | -189 | -185 | 406  | 432 | 1217   | 4857  | 4861 | 4868 | 4881 | Num. | GABA   | Num. | GABA                |
| Hap1                                        | T        | G    | T    | A    | T    | A    | T    | A    | A   | A      | A     | G    | T    | G    | 0    | —      | 36   | 169.01 <sup>a</sup> |
| Hap2                                        | C        | A    | C    | G    | C    | C    | G    | G    | G   | C      | G     | A    | C    | A    | 348  | 135.85 | 174  | 128.37 <sup>b</sup> |
| -log <sub>10</sub> ( <i>P</i> ) Full        | 4.5      | 5.3  | 5.1  | 5.1  | 4.2  | 4.1  | 4.1  | 4.3  | 4.5 | 4.6    | 5.9   | 6.3  | 6.5  | 7.2  |      |        |      |                     |
| -log <sub>10</sub> ( <i>P</i> ) <i>Jap.</i> | 4.0      | 5.3  | 5.1  | 5.1  | 4.0  | 3.8  | 3.8  | 3.8  | 3.8 | 3.8    | 5.7   | 5.7  | 6.2  | 6.2  |      |        |      |                     |

| LOC_Os09g24290                              |          |       |       |      |        |      |      |      |      |      |      |      |      |      |      |      |      |        |      |                     |
|---------------------------------------------|----------|-------|-------|------|--------|------|------|------|------|------|------|------|------|------|------|------|------|--------|------|---------------------|
| Hap.                                        | Promoter |       |       |      | Intron |      | Exon |      |      |      |      |      |      |      |      |      | Ind. |        | Jap. |                     |
|                                             | -1490    | -1481 | -1101 | -219 | 3074   | 3092 | 3297 | 3334 | 3364 | 3633 | 3737 | 3741 | 3782 | 3785 | 5576 | 5613 | Num. | GABA   | Num. | GABA                |
| Hap1                                        | A        | T     | C     | A    | T      | C    | A    | C    | C    | G    | A    | A    | T    | T    | G    | T    | 0    | —      | 41   | 161.24 <sup>a</sup> |
| Hap2                                        | C        | C     | T     | G    | C      | T    | G    | T    | T    | A    | G    | G    | C    | C    | A    | C    | 357  | 135.75 | 178  | 128.37 <sup>b</sup> |
| -log <sub>10</sub> ( <i>P</i> ) Full        | 4.4      | 4.6   | 4.4   | 4.4  | 4.2    | 4.1  | 5.1  | 5.4  | 4.7  | 4.5  | 6.0  | 6.1  | 5.0  | 4.9  | 4.8  | 4.3  |      |        |      |                     |
| -log <sub>10</sub> ( <i>P</i> ) <i>Jap.</i> | 4.0      | 4.3   | 4.2   | 3.8  | 3.8    | 3.7  | 4.7  | 4.7  | 4.0  | 3.8  | 5.1  | 5.2  | 4.0  | 3.9  | 4.3  | 4.1  |      |        |      |                     |

| LOC_Os09g24320                              |          |       |       |       |       |       |       |       |      |        |      |                     |
|---------------------------------------------|----------|-------|-------|-------|-------|-------|-------|-------|------|--------|------|---------------------|
| Hap.                                        | Promoter |       |       |       |       |       |       |       | Ind. |        | Jap. |                     |
|                                             | -856     | -1137 | -1151 | -1178 | -1181 | -1219 | -1715 | -1760 | Num. | GABA   | Num. | GABA                |
| Hap1                                        | T        | T     | G     | T     | C     | G     | T     | T     | 0    | —      | 36   | 169.01 <sup>a</sup> |
| Hap2                                        | G        | C     | A     | C     | T     | A     | G     | G     | 348  | 135.85 | 174  | 128.37 <sup>b</sup> |
| -log <sub>10</sub> ( <i>P</i> ) Full        | 5.6      | 5.3   | 6.0   | 4.2   | 4.1   | 6.4   | 4.6   | 4.2   |      |        |      |                     |
| -log <sub>10</sub> ( <i>P</i> ) <i>Jap.</i> | 4.8      | 3.7   | 4.0   | 4.1   | 3.8   | 5.8   | 4.1   | 4.1   |      |        |      |                     |

Supplementary figure S1. Haplotype analysis of the other four candidate genes of *qTFC9-7*.
